# Supplementary material
Source: PubMed Central journal article supplement (PMC6231974)
Supplement: NIHMS1506861-supplement-1.pdf [file NIHMS1506861-supplement-1.pdf]

Supplemental Materials

Supplemental Figure 1.

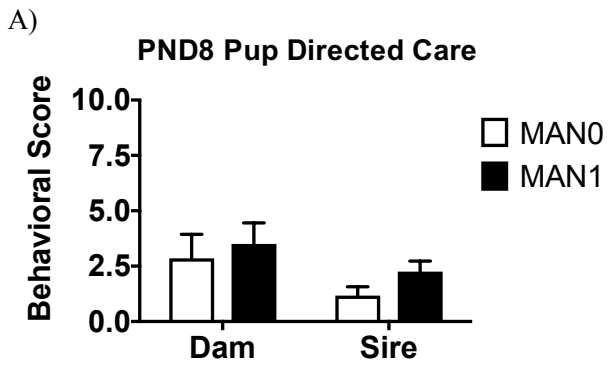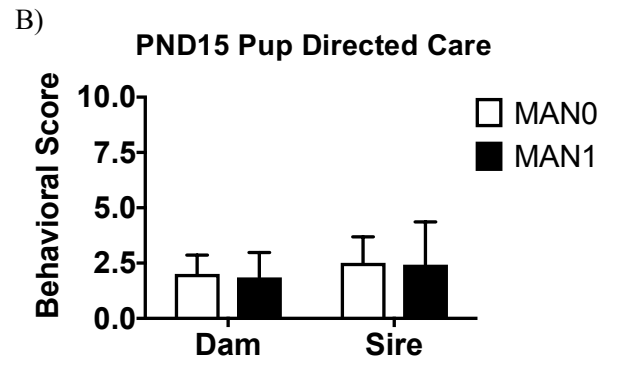

**Supplemental Figure 2.**

A)

Human: >hg38\_dna range=chr3:8769078-8769148

GTCTCAATCCCGAGAAGTCACTTTACAATCTCTCGGAACACCCCGAGCTCCTCCAGGAACAAGGAGTGCGA  
 -901 -924 -934

Mouse: >mm10\_dna range=chr6:112490620-112490691

ACCTTCGTCCAAGCTGTCACTTTTCAGTCTCTCTCGGTACACCCTGAGCACCTCCCGGAACCAGAGACGTGA  
 -924

Rat: >rn6\_dna range=chr4:144416943-144417009

ATCTTCGTCCAAGCTTTTCAGGCTCTCAGAACATCCTGAGCACCTCCTCCGGGAACCAGAGGTGCGA

Prairie vole\*

GTAGTCGTCCGAAGTGTCACTTTTCAGTCCCTCGGAGTACCCTGAGCGATTTCCGGGAACCAGAAGTGTGA  
 -901 -924 -934\_2 -934\_1

B)

```

                -901
Human  gtctcaat-----cccgagaagt-----c-----
Prairie vole  gtagtcgt-----ccgaa-ctgt-----c-----
Mouse  accttcgt-----ccaag-ctgt-----c-----
Rat    atcttcgt-----ccaag-----

                -924      -934
Human  ---actt---tac-aa--tctc---tcggaa--caccccgagctcctc---ca---ggaacaa---
Prairie vole  ---actt---ttc-ag--tccc---tcggag--taccctgagcggattt---cg---ggaacca---
Mouse  ---actt---ttc-agtctctc---tcggta--cacctgagcacctc---cc---ggaacca---
Rat    ---ctt---ttc-ag--gctc---tcagaa--catcctgagcacctc---ctccgggaacca---

Human  ---ggagtg-c-ga
Prairie vole  ---gaagtg-t-ga
Mouse  ---gagacg-t-ga
Rat    ---gaggtg-c-ga
    
```

C)

Statistics: (shuffled [200]) MLE statistics: Lambda= 0.2081; K=0.4636  
 statistics sampled from 1 (1) to 200 sequences  
 Algorithm: Smith-Waterman (SSE2, Michael Farrar 2006) (7.2 Nov 2010)  
 Parameters: DNA matrix (5:-4), open/ext: -12/-4  
 Scan time: 0.000

The best scores are:

Vole ( 70) [f] s-w bits E(10000) 157 48.3 1.5e-11

>>>Human, 71 nt vs TMP.q2 library

>>Vole (70 nt)  
 s-w opt: 157 Z-score: 239.9 bits: 48.3 E(10000): 1.5e-11  
 Smith-Waterman score: 157; 72.6% identity (72.6% similar) in 62 nt overlap (10-71:9-70)  
[Sequence Lookup](#) [General re-search](#) [Pairwise alignment](#)

```

          10      20      30      40      50      60      70
Human  GTCTCAATCCCGAGAAGTCACTTTACAATCTCTCGGAACACCCCGAGCTCCTCCAGGAACAAGGAGTGCGA
      ::::  :::::  ::  ::  :::::  ::::  ::::  ::  ::  ::::  ::  ::::  ::
Vole   GTAGTCGTCCGAAGTGTCACTTTTCAGTCCCTCGGAGTACCCTGAGCGATTTCCGGGAACCAGAAGTGTGA
          10      20      30      40      50      60      70
    
```

Supplemental Figure 3.

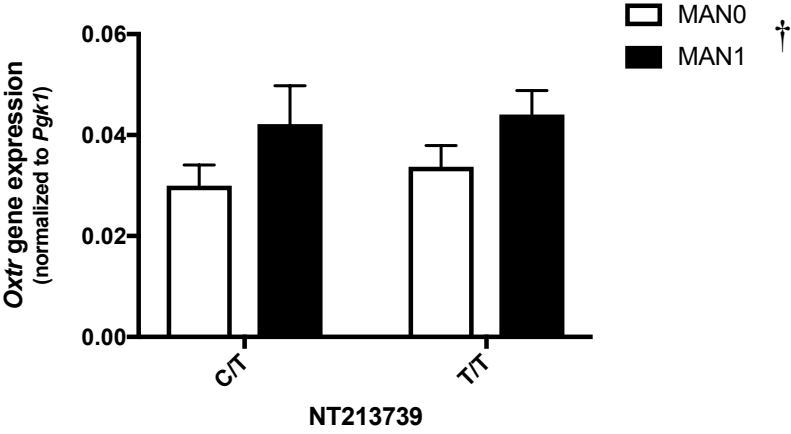

Supplemental Figure 4.

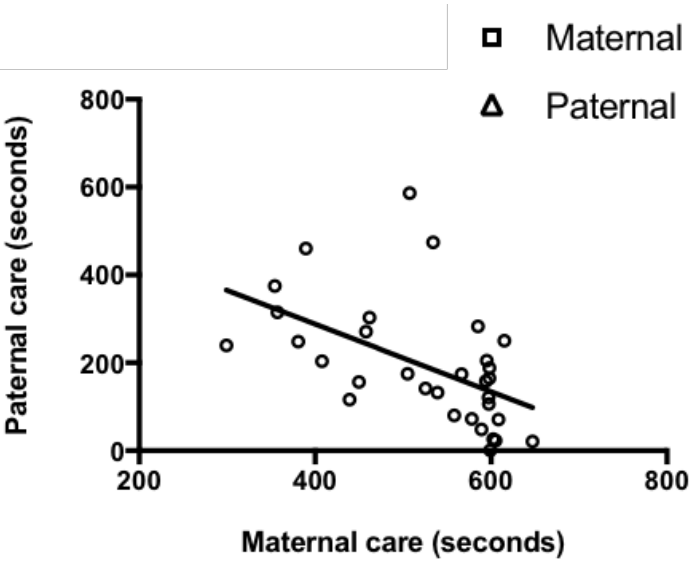

**Supplemental Table 1.**

---

|                        | <b>1</b> | <b>2</b> | <b>3</b> | <b>4</b> | <b>5</b> | <b>6</b> | <b>7</b> | <b>8</b> |
|------------------------|----------|----------|----------|----------|----------|----------|----------|----------|
| <b>1. Blood -934_1</b> | 1.00     |          |          |          |          |          |          |          |
| <b>2. Blood -934_2</b> | 0.95     | 1.00     |          |          |          |          |          |          |
| <b>3. Blood -924</b>   | 0.96     | 0.95     | 1.00     |          |          |          |          |          |
| <b>4. Blood -901</b>   | 0.86     | 0.88     | 0.92     | 1.00     |          |          |          |          |
| <b>5. Nacc -934_1</b>  | 0.68     | 0.70     | 0.59     | 0.53     | 1.00     |          |          |          |
| <b>6. NAcc -934_2</b>  | 0.60     | 0.68     | 0.49     | 0.42     | 0.90     | 1.00     |          |          |
| <b>7. NAcc -924</b>    | 0.71     | 0.75     | 0.65     | 0.57     | 0.91     | 0.88     | 1.00     |          |
| <b>8. NAcc -901</b>    | 0.76     | 0.80     | 0.71     | 0.65     | 0.83     | 0.81     | 0.89     | 1.00     |

---

## Supplemental Figure and Table Legends

**Supplemental Figure 1. Differences in parental care in MAN model are transient.** Parental care of offspring following early manipulation did not differ between MAN0 and MAN1 groups on (A) PND 8 or (B) PND 15.

**Supplemental Figure 2. A portion of the human MT2 region in *OXTR* is conserved in prairie voles.** (A) Genome position and sequences of similar *OXTR* regulatory region in humans and rodents. Prairie vole sequence from GenBank: DP001214.1 (B) Partial output of UCSC Multiz alignment highlighting conserved CpG sites of putative *OXTR* regulatory region in multiple species. (C) Output from PRSS found at <http://fasta.bioch.virginia.edu/>.

**Supplemental Figure 3. Polymorphism NT213739 does not impact *Oxtr* gene expression in this sample.** A polymorphism (NT213739) in the prairie vole *Oxtr* gene was previously reported (King et al, 2016) to impact transcription of the gene. We did not identify C/C homozygotes in the sample we studied and there was no significant difference in transcription between C/T (MAN0, n=5; MAN1, n=4) and T/T (MAN0, n=9; MAN1, n=8) genotypes in our sample. (2-way Handling Condition x SNP ANOVA, † main effect of handling,  $F_{(1,22)}=4.559, p=0.0441$ ; no effect of SNP,  $F_{(1,22)}=0.2909, p=0.5950$ ; error bars indicate standard error).

**Supplemental Figure 4. Relationship between maternal and paternal behavior.** Naturally varying levels of maternal and paternal care are inversely related.

**Supplemental Table 1. Correlation of DNA methylation levels between *Oxtr* CpG sites.** Methylation values are strongly correlated between CpG sites both within and across tissue types.
